# Supplementary material
Source: PubMed Central journal article supplement (PMC4808154)
Supplement: AAC.02822-15_zac004165026so1.pdf [file AAC.02822-15_zac004165026so1.pdf]

**Table S1.** Primers used in this study

| Primers                                            | Sequence (5' - 3')         | Positions <sup>a</sup> | References |
|----------------------------------------------------|----------------------------|------------------------|------------|
| For amplification of the 23S rRNA gene             |                            |                        |            |
| 23SunivF <sup>b</sup>                              | GCTCGAAGGTTAATTGATG        | 43425-43443            | (1)        |
| 23SunivR <sup>b</sup>                              | GCTCTTGGCAGAACAAC          | 44277-44293            | (1)        |
| FI                                                 | CCCTAAGTCAAGCCTTTCAATCC    | 38701-38723            | (2)        |
| FII                                                | CGTTATAGATACGCTTAGCGGTTATG | 393562-393587          | (2)        |
| FIII                                               | CATCGAGCAAGAGTTTATGCAAGC   | 695881-695904          | (2)        |
| CJ copy-R <sup>b</sup>                             | CTACCCACCAGACATTGTCCCAC    | 43803-43825            | (2)        |
| For amplification of L4/L22 protein-encoding genes |                            |                        |            |
| L4-F                                               | GTAGTTAAAGGTGCAGTACCA      | 1619846-1619866        | (3)        |
| L4-R                                               | GCGAAGTTTGAATAACTACG       | 1619100-1619119        | (3)        |
| L22-F                                              | GAATTTGCTCCAACACGC         | 1617842-1617859        | (3)        |
| L22-R                                              | ACCATCTTGATTCCCAGTTTC      | 1617292-1617312        | (3)        |
| For amplification of the <i>erm(B)</i> gene        |                            |                        |            |
| ermB-F                                             | GGGCATTTAACGACGAAACTGG     |                        | (4)        |
| ermB-R                                             | CTGTGGTATGGCGGGTAAGT       |                        | (4)        |

<sup>a</sup>The numbering of positions were assigned based on the complete genome of *C. jejuni* NCTC 11168 strain (GenBank accession no. AL111168).

<sup>b</sup>The positions for the primers were present within the 23S rRNA genes. The numbering of the primers was assigned based on the 23S rRNA gene (positions 41568 to 44457).

## REFERENCES

1. Perez-Boto, D., Lopez-Portoles, J. A., Simon, C., Valdezate, S., and Echeita, M. A. 2010. Study of the molecular mechanisms involved in high-level macrolide resistance of Spanish *Campylobacter jejuni* and *Campylobacter coli* strains. *J Antimicrob Chemother* **65**: 2083-2088.
2. Gibreel, A., Kos, V. N., Keelan, M., Trieber, C. A., Levesque, S., Michaud, S., and Taylor, D. E. 2005. Macrolide resistance in *Campylobacter jejuni* and *Campylobacter coli*: molecular mechanism and stability of the resistance phenotype. *Antimicrob Agents Chemother* **49**: 2753-2759.
3. Lehtopolku, M., Kotilainen, P., Haanpera-Heikkinen, M., Nakari, U. M., Hanninen, M. L., Huovinen, P., Siitonen, A., Eerola, E., Jalava, J., and Hakanen, A. J. 2011. Ribosomal mutations as the main cause of macrolide resistance in *Campylobacter jejuni* and *Campylobacter coli*. *Antimicrob Agents Chemother* **55**: 5939-5941.

4. Wang, Y., Zhang, M., Deng, F., Shen, Z., Wu, C., Zhang, J., Zhang, Q., and Shen, J. 2014. Emergence of multidrug-resistant *Campylobacter* species isolates with a horizontally acquired rRNA methylase. *Antimicrob Agents Chemother* **58**: 5405-5412.
